# Supplementary material for: Pathways of cylindrical orientations in PS-b-P4VP diblock copolymer thin films upon solvent vapor annealing
Source: Royal Society of Chemistry journal article supplement (doi:10.1039/c4sm01460j), 2014-01-01
Supplement: c4sm01460j1.pdf [file c4sm01460j1.pdf]

## Electronic Supporting Information

### **Pathways of Cylindrical Orientations in PS-*b*-P4VP Diblock Copolymer Thin Films upon Solvent Vapor Annealing**

**E. Bhoje Gowd<sup>1,2,3\*</sup>, Tadanori Koga<sup>2</sup>, Maya K. Endoh,<sup>2</sup> Kamlesh Kumar<sup>3</sup> and Manfred Stamm<sup>3,4</sup>**

<sup>1</sup>Materials Science and Technology Division, CSIR-National Institute for Interdisciplinary Science and Technology, Trivandrum-695 019, Kerala, India

<sup>2</sup> Chemical and Molecular Engineering Program, Department of Materials Science and Engineering, Stony Brook University, Stony Brook, NY 11794-2275, USA

<sup>3</sup>Department of Nanostructured Materials, Leibniz Institute of Polymer Research Dresden, Hohe Strasse 6, 01069, Dresden, Germany

<sup>4</sup>Physical Chemistry of Polymer Materials, Technische Universität Dresden, 01062 Dresden, Germany

\*Corresponding Author:

*E-mails:* [bhojegowd@niist.res.in](mailto:bhojegowd@niist.res.in)

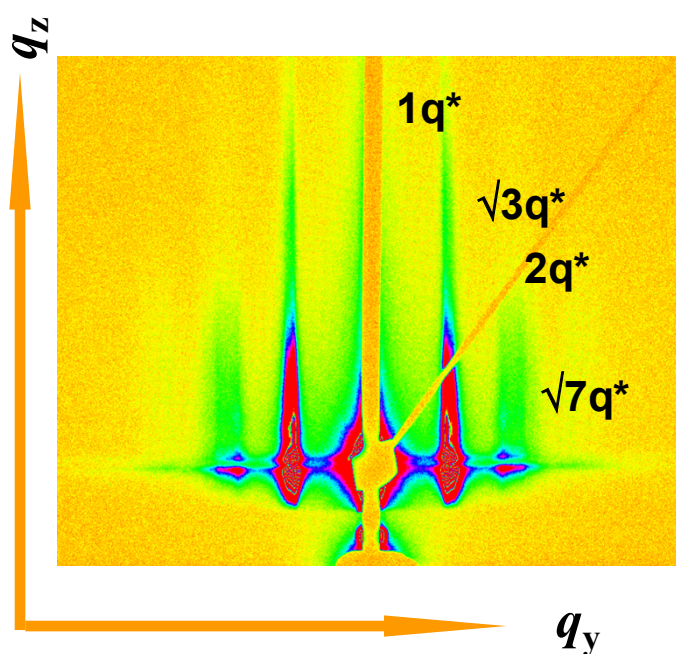

**Figure S1.** 2D GISAXS image collected for the perpendicularly oriented PS-b-P4VP cylinders ( $C\perp$ ) at a rotation angle.

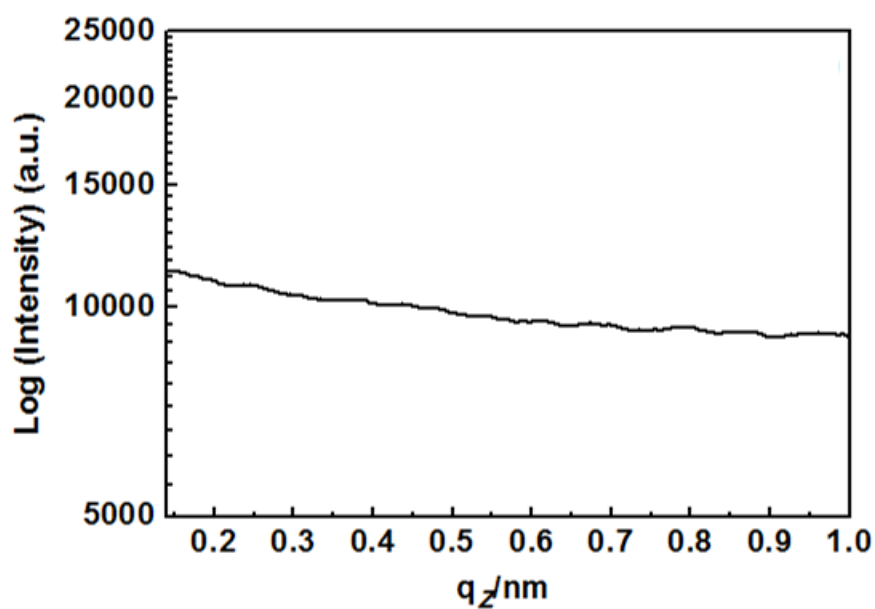

**Figure S2.** The *Out-of-plane* GISAXS line profile at  $t = 10$  min (swollen state) for perpendicularly oriented PS-b-P4VP cylinders ( $C\perp$ ) upon the exposure to the saturated vapors of chloroform.
